# Supplementary material for: Occurrence, Distribution and Ecological Risk of Bisphenol Analogues in The Surface Water from A Water Diversion Project in Nanjing, China
Source: Preprints.org preprint supplement (doi:10.20944/preprints201908.0067.v1), 2019-08-06
Supplement: Supplementary file 1 [file supplementary]

# 1 Occurrence, Distribution and Ecological Risk of 2 Bisphenol Analogues in The Surface Water from A 3 Water Diversion Project in Nanjing, China

4 Chaoya Zheng <sup>a</sup>, Jianchao Liu <sup>a,\*</sup>, Jinghua Ren <sup>b</sup>, Jie Shen <sup>c</sup>, Jian Fan <sup>b</sup>, Ruiyu Xi <sup>a</sup>, Wei Chen <sup>a</sup> and  
5 Qing Chen <sup>d</sup>

6  
7 <sup>a</sup> Key Laboratory of Integrated Regulation and Resources Development, College of Environment, Hohai  
8 University, Nanjing 210098, China

9 <sup>b</sup> Engineering innovation center of land ecological monitoring and remediation, ministry of natural resources,  
10 Geological Survey of Jiangsu Province, Nanjing 210018, China

11 <sup>c</sup> Everbright environmental technology equipment (Changzhou) Co., Ltd., Changzhou 213011, China

12 <sup>d</sup> Suzhou Litree Ultra-Filtration Membrane Technology Co., Ltd., Suzhou 215000, China

13 \* Correspondence to: Jianchao Liu

14 Phone number: 86-25-83787894

15 Fax number: 86-25-83787330

16 mail address: jianchao-liu@hhu.edu.cn

## 17 Contents

18 2.3 Sample extraction and instrument analysis

19 2.4 Quality assurance and quality control

20 2.5 Parameter measurement and statistical analysis

21 Table S1. The mobile phase compositions of the separation methods.

22 Table S2. The six BPs of the optimized MS/MS parameters.

23 Table S3. Recovery values obtained for the three independent concentrations of spiked quality control  
24 samples.

25 Table S4. Concentrations of BPs reported as mean (median) and minimum-maximum observed  
26 globally.

27 Table S5. The BPs' aquatic toxicity data of the most sensitive aquatic species.

28

## 29 2.3 Sample extraction and instrument analysis

30 Other instrumental parameters of UPLC/MS/MS were showed in Table S1 and Table S2.

31 Table S1

| <b>Time (min)</b> | <b>Composition of the mobile phase (%)</b> |                          |
|-------------------|--------------------------------------------|--------------------------|
| Negative mode     | Eluent A2 (0.01%Ammonium hydroxide)        | Eluent B1 (Acetonitrile) |
| 0                 | 90                                         | 10                       |
| 0.25              | 90                                         | 10                       |
| 3.00              | 10                                         | 90                       |
| 4.00              | 10                                         | 90                       |
| 4.01              | 90                                         | 10                       |
| 5.00              | 90                                         | 10                       |

32

33 Table S2

| <b>Compound</b> | <b>Retention time/min</b> | <b>Parent ion (m/z)</b> | <b>Daughter ions(m/z)</b> | <b>Dewll time(s)</b> | <b>Conevol tage (v)</b> | <b>Collision energy (v)</b> |
|-----------------|---------------------------|-------------------------|---------------------------|----------------------|-------------------------|-----------------------------|
| Bisphenol F     | 2.74                      | 199.10                  | 93.10                     | 0.042                | 30                      | 20                          |
|                 |                           |                         | 105.10*                   |                      |                         | 20                          |
| Bisphenol E     | 2.89                      | 213.10                  | 198.00*                   | 0.042                | 40                      | 22                          |
|                 |                           |                         | /                         |                      |                         | /                           |
| Bisphenol A     | 3.03                      | 227.10                  | 133.00                    | 0.042                | 31                      | 25                          |
|                 |                           |                         | 212.00*                   |                      |                         | 17                          |
| Bisphenol S     | 0.66                      | 249.13                  | 92.05                     | 0.161                | 42                      | 30                          |
|                 |                           |                         | 108.07*                   |                      |                         | 24                          |
| Bisphenol Z     | 3.45                      | 267.22                  | 93.02                     | 0.042                | 56                      | 32                          |
|                 |                           |                         | 173.17*                   |                      |                         | 30                          |
|                 |                           |                         | 197.10                    |                      |                         | 25                          |
| Bisphenol AF    | 3.25                      | 335.23                  | 265.16*                   | 0.042                | 32                      | 22                          |
|                 |                           |                         | 419.92*                   |                      |                         | 40                          |

34 \* represents quantification ion.

35

## 36 2.4 Quality assurance and quality control

37 The strict QA/QC protocol was used to detect the extraction efficiency of BPs in the water sample.  
 38 The performance of the analytical method was evaluated in terms of linearity, limit of detection  
 39 (LOD) and limit of quantitative (LOQ) and recovery rate. When analyzing each group of samples,  
 40 running solvent, standar, and process blanks in turn to check background BPs, peak identification,  
 41 and quantification. Respectively, LOD and LOQ were determined to be the minimum detectable  
 42 amounts of the analyte with signal-to-noise (S/N) of 3 and 10. Through injecting different  
 43 concentrations of the standard solutions (seven-point calibration curve) into the 1.0-200 ng/mL range  
 44 ( $R^2 > 0.998$ ), the linearity of the target compounds was studied. In order to evaluate the recovery, the  
 45 spiked samples were prepared using ordinary surface water samples. Prior to use, surface water  
 46 samples used for recovery test were analyzed to detect the presence of BPs. The recovery data for BPs  
 47 had been corrected to take into account the fact that the average blank peak area of BPs was subtracted  
 48 from the average peak area of the other recovery points. Six separate chromatographic runs were  
 49 performed on each of the two concentration levels. The analysis of the reagent blanks (n=3) showed  
 50 that the analysis system and glassware did not contain BPs.

51 Table S3

| Compound | Recovery [%] (n = 6) |           |             |           | Quantitation limits (n = 3) |        |
|----------|----------------------|-----------|-------------|-----------|-----------------------------|--------|
|          | Water sample         |           | SPM samples |           | Water                       | SPM    |
|          | 10 ng/L              | 100 ng/L  | 10 ng/g     | 100 ng/g  | (ng/L)                      | (ng/g) |
| BPF      | 83.0±12.4            | 97.8±10.2 | 82.4±13.1   | 90.2±10.0 | 11.10                       | 1.50   |
| BPE      | 88.4±7.2             | 92.3±10.7 | 75.7±6.3    | 82.0±10.4 | 1.83                        | 0.50   |
| BPA      | 91.0±8.1             | 108±9.9   | 102±10.8    | 110±11.5  | 2.60                        | 0.25   |
| BPS      | 80.3±4.0             | 91.4±16.3 | 79.3±9.3    | 84.7±6.5  | 0.53                        | 0.30   |
| BPZ      | 70.3±5.6             | 85.6±10.0 | 73.5±7.4    | 80.2±7.1  | 7.07                        | 1.00   |
| BPAF     | 93.1±16.3            | 96.2±8.0  | 82.2±11.4   | 92.3±10.1 | 1.70                        | 0.30   |

52

53 2.5 Parameter measurement and statistical analysis

54 Using the risk quotient (RQ) to evaluate the risk assessment of the target compounds in the urban  
 55 water. The RQ<sub>s</sub> was calculated as Eq (1).

$$56 \quad RQ = \frac{MEC}{PNEC} = \frac{MEC}{EC_{50} \text{ or } LC_{50}/f} \quad (1)$$

57 MEC and PNEC are measured environmental concentrations and predicted no-effect  
 58 concentrations. According to the REACH guidance document, in order to estimate PNEC based on  
 59 toxicity data when only short-term/acute toxicity data EC<sub>50</sub> or LC<sub>50</sub> is available, PNEC is calculated  
 60 by the EC<sub>50</sub> or LC<sub>50</sub> that divides the safety factor (*f*) 1000. Once a long-term/chronic NOEC value of  
 61 one, two or three nutritional levels is available, using the *f* of the 100, 50, or 10 (ECHA, 2008). PNEC  
 62 is derived from chronic and acute toxicity data in the literature and is 100 or 1000 *f* in our study. Table  
 63 3 provides PNEC calculations for algae, daphnia and fish.

64 Calculation of the oestrogen equivalent concentration (EEQ) of a chemically determined mixture  
 65 is based on all measured xenoestrogens with a known oestrogen equivalency factor (EEF; Table 3), as  
 66 shown in the following equation (Eq. (2)). When EEQ<sub>Total</sub> > 1.0 ng E<sub>2</sub>/L, the contaminants are thought  
 67 to affect the endocrine systems of organisms in the water bodies. So EEQ is also used to assess the  
 68 risk of BPs to human health.

$$69 \quad EEQ_{Total} = \sum EEQ_i = \sum (C_i \times EEF_i) \quad (2)$$

70 The C<sub>*i*</sub> refers to the compound *i* with a concentration of C in the traditional dissolved phase.  
 71 EEQ<sub>Total</sub> is the total estradiol equivalent and EEF<sub>*i*</sub> is the estradiol equivalent.

72

73

74

75

76

77 **Table S4**

| Sampling locations              | Time                      | Concentrations (ng/L) in traditionally soluble phase |                         |                             |                          | Reference  |
|---------------------------------|---------------------------|------------------------------------------------------|-------------------------|-----------------------------|--------------------------|------------|
|                                 |                           | BPA                                                  | BPS                     | BPF                         | BPAF                     |            |
| Study area                      | 2018 <sup>a</sup><br>(07) | 290 (244)<br>133-576                                 | 43.6(42.1)<br>5.87-83.5 | 2.53<br>(2.23)<br>ND-5.44   | 6.68 (4.51)<br>1.62-17.8 | This study |
| Wujin district                  | 2018<br>(08)              | 217 (157)<br>73.5-678                                | 60.5(32.1)<br>7.80-319  | 7.13<br>(4.61)<br>1.14-40.1 | 2.70 (2.05)<br>0.30-17.7 | [1]        |
| Taihu Lake                      | 2013<br>(09)              | 8.5 (7.9)<br>4.2-14                                  | 6.0 (2.0)<br>0.28-67    | 0.83 (0.5)<br>ND-5.6        | 0.28 (0.2)<br>0.13-1.1   | [2]        |
| Taihu Lake                      | 2015<br>(05)              | 9.7 (7.3)<br>3.9-33.2                                | 2.6 (0.94)<br>0.32-27.3 | 1.24 (1.1)<br>0.5-3.28      | 0.27 (0.1)<br>0.06-2     | [3]        |
| Taihu Lake                      | 2015<br>(11)              | 92.6 (53.2)<br>28-565                                |                         |                             |                          | [4]        |
| Taihu Lake                      | 2016<br>(04)              | 97<br>28-560                                         | 120<br>4.5-1600         | 140<br>ND-1600              | 8.2<br>0.7-23            | [5]        |
| Taihu Lake                      | 2016<br>(11)              | 25.7 (23.8)<br>19.4-68.5                             | 15.9 (6.6)<br>41.-157   | 78 (30)<br>25.6-723         | 114 (111)<br>110-140     | [6]        |
| Luoma Lake                      | 2016<br>(04)              | 86<br>49-110                                         | 21<br>ND-94             | 6.8<br>3.5-14               | 17<br>12-84              | [5]        |
| Liaohe River                    | 2013<br>(09)              | 47 (29)<br>5.9-141                                   | 14 (8.9)<br>0.22-52     | ND <sup>b</sup>             | 1.9 (1.0)<br>0.5-9.6     | [2]        |
| Hunhe River                     | 2013<br>(09)              | 40 (42)<br>4.4-107                                   | 11 (8.4)<br>0.61-46     | ND                          | 2.4 (0.94)<br>0.61-11    | [2]        |
| Pearl River                     | 2013<br>(07) -            | 73 (73)<br>ND-98                                     | 135 (135)<br>ND-135     | 773 (757)<br>448-1110       | ND                       | [7]        |
| West River                      | 2014<br>(03)              | 43 (43)<br>ND-43                                     | ND                      | 64 (64)<br>ND-105           | ND                       |            |
| 20 source water<br>China        | 2017<br>(11)              | 12.8 (10.5)<br>ND-34.9                               | 1.1 (0.4)<br>ND-5.2     | 2.2 (ND)<br>ND-12.6         | 3.0 (0.1)<br>ND-10.8     | [8]        |
| Several Rivers,<br>Bay (Japan)  | 2013                      | 104<br>ND-431                                        | 5.3<br>ND-15            | 638<br>ND-2850              | ND                       |            |
| Several Rivers<br>(Korea)       | (07) -<br>2014            | 105.7<br>1.0-272                                     | 41<br>ND-42             | 633<br>ND-1300              | ND                       | [7]        |
| Several Rivers,<br>Lake (India) | (03)                      | 551<br>ND-1950                                       | 2174<br>ND-7200         | 91.5<br>ND-289              | ND                       |            |

78 <sup>a</sup> Year (Month). <sup>b</sup> ND: not detected.

79 **Table S5**

| Compound | Non-target organisms | Test Endpoint | Toxicity data (mg/L) | PNEC (ng/L) | Reference         | EEF Ref. [17]         |
|----------|----------------------|---------------|----------------------|-------------|-------------------|-----------------------|
| BPA      | Algae                | 72h-EC50      | 2.2 (Growth)         | 2200        | [9]               | 1.07×10 <sup>-4</sup> |
|          | Daphnia              | 48h-EC50      | 3.9 (Immobility)     | 3900        | [10]              |                       |
|          | Fish                 | 48h-EC50      | 3.6 (Pigmentation)   | 3600        | [11]              |                       |
| BPS      | Algae                | 96h-EC50      | 6.9                  | 6900        | [13] <sup>a</sup> | 1.06×10 <sup>-6</sup> |
|          | Daphnia              | 48h-EC50      | 55 (Immobility)      | 55000       | [14]              |                       |
|          | Fish                 | 72 hpf-EC50   | 155 (Mortality)      | 155000      | [15]              |                       |
| BPF      | Algae                | 72h-IC50      | 22.1 (Growth)        | 22100       | [11]              | 1.08×10 <sup>-4</sup> |
|          | Daphnia              | 21d-NOEC      | 0.84 (Reproduction)  | 8400        | [11]              |                       |
|          | Fish                 | 48h-EC50      | 1.1 (Pigmentation)   | 1100        | [11]              |                       |
| BPAF     | Algae                | 72h-IC50      | 3.0 (Growth)         | 3000        | [11]              | 7.23×10 <sup>-4</sup> |
|          | Daphnia              | 21d-NOEC      | 0.23 (Reproduction)  | 2300        | [11]              |                       |
|          | Fish                 | 72hpf-EC50    | 0.92 (Mortality)     | 920         | [15]              |                       |
| BPE      | Daphnia              | 48h-EC50      | 18                   | 18000       | [14]              | 5.92×10 <sup>-5</sup> |
|          | Fish                 | EC50          | 0.0579               | 57.9        | [16]              |                       |

80 <sup>a</sup> The toxicity data was calculated from the ecological structure activity relationships (ECOSAR)  
81 model.

82

### 83 Reference

84 1. Si, W., Cai, Y., Liu, J., Shen, J., Chen, Q., Chen, C., Ning, L., 2019. Investigating the role of colloids  
85 on the distribution of bisphenol analogues in surface water from an ecological demonstration  
86 area, China. *Science of the Total Environment*. 673, 699-707.

87 2. Jin, H., Zhu, L., 2016. Occurrence and partitioning of bisphenol analogues in water and sediment  
88 from Liaohe River basin and Taihu Lake, China. *Water Research*. 103, 343-351.

89 3. Wang, Q., Chen, M., Shan, G., Chen, P., Cui, S., Yi, S., Zhu, L., 2017. Bioaccumulation and  
90 biomagnification of emerging bisphenol analogues in aquatic organisms from Taihu Lake, China.

- 91 Science of the Total Environment 598, 814-820.
- 92 4. Liu, D., Liu, J.N., Guo, M., Xu, H.Z., Zhang, S.H., Shi, L.L., Yao, C., 2016. Occurrence, distribution,  
93 and risk assessment of alkylphenols, bisphenol A, and tetrabromobisphenol A in surface water,  
94 suspended particulate matter, and sediment in Taihu Lake and its tributaries. *Marine Pollution*  
95 *Bulletin*. 112, 142-150.
- 96 5. Yan, Z., Liu, Y., Yan, K., Wu, S., Han, Z., Guo, R., Chen, M., Yang, Q., Zhang, S., Chen, J., 2017.  
97 Bisphenol analogues in surface water and sediment from the shallow Chinese freshwater lakes:  
98 Occurrence, distribution, source apportionment, and ecological and human health risk.  
99 *Chemosphere*. 184, 318-328.
- 100 6. Liu, Y., Zhang, S., Song, N., Guo, R., Chen, M., Mai, D., Yan, Z., Han, Z., Chen, J., 2017. Occurrence,  
101 distribution and sources of bisphenol analogues in a shallow Chinese freshwater lake (Taihu  
102 Lake): Implications for ecological and human health risk. *Science of the Total Environment*. 599,  
103 1090-1098.
- 104 7. Yamazaki, E., Yamashita, N., Taniyasu, S., Lam, J., Lam, P. K.S., Moon, H.B., Jeong, Y., Kannan, P.,  
105 Achyuthan, H., Munuswamy, N., Kannan, K., 2015. Bisphenol A and other bisphenol analogues  
106 including BPS and BPF in surface water samples from Japan, China, Korea and India.  
107 *Ecotoxicology and Environmental Safety*. 122, 565-572.
- 108 8. Zhang, H., Zhang, Y., Li, J., Yang, M., 2019. Occurrence and exposure assessment of bisphenol  
109 analogues in source water and drinking water in China. *Science of the total Environment*. 655,  
110 607-613.
- 111 9. Debenest, T., Gagné, F., Petit, A. N., André, C., Kohli, M., Blaise, C., 2010. Ecotoxicity of a  
112 brominated flame retardant (tetrabromobisphenol A) and its derivatives to aquatic organisms  
113 *Comp. Comparative Biochemistry and Physiology Part C: Toxicology & Pharmacology*. 152. 407-  
114 412.
- 115 10. Staples, C.A., Dome, P.B., Klecka, G.M., Oblock, S.T., Harris, L.R., 1998. A review of the

- 116 environmental fate, effects, and exposures of bisphenol A. *Chemosphere*. 36, 2149-2173.
- 117 11. Tišler, T., Krel, A., Gerželj, U., Erjavec, B., Dolenc, M. S., Pintar, A., 2016. Hazard identification and  
118 risk characterization of bisphenols A, F and AF to aquatic organisms. *Environmental Pollution*.  
119 212, 472-479.
- 120 13. US Environmental Protection Agency. 2011. Estimation Program Interface EPI, Suite, Version  
121 Environmental Protection Agency, Office of Pollution Prevention and Toxic's, Washington, DC,  
122 USA.
- 123 14. Chen, M.Y., Ike, M., Fujita, M., 2002. Acute toxicity, mutagenicity, and estrogenicity of bisphenol-  
124 A and other bisphenols. *Environmental Toxicology*. 17, 80-86.
- 125 15. Moreman, J., Lee, O., Trznadel, M., David, A., Kudoh, T., Tyler, C.R., 2017. Acute toxicity,  
126 teratogenic, and estrogenic effects of bisphenol A and its alternative replacements bisphenol S,  
127 bisphenol F, and bisphenol AF in zebrafish embryo-larvae. *Environmental Science & Technology*.  
128 51, 12796-12805.
- 129 16. Owczarek, K., Kudlak, B., Simeonov, V., Mazerska, Z., Namiesnik, J., 2018. Binary Mixtures of  
130 Selected Bisphenols in the Environment: Their Toxicity in Relationship to Individual Constituents.  
131 *Molecules*. 23, 3226.
- 132 17. Ruan, T., Liang, D., Song, S., Song, M., Wang, H., Jiang, G., 2015. Evaluation of the in vitro  
133 estrogenicity of emerging bisphenol analogs and their respective estrogenic contributions in  
134 municipal sewage sludge in China. *Chemosphere*. 124, 150-155.
